# Supplementary material for: Physiologically Relevant In Vitro-In Vivo Correlation (IVIVC) Approach for Sildenafil with Site-Dependent Dissolution
Source: Pharmaceutics. 2019 Jun 1;11(6):251. doi: 10.3390/pharmaceutics11060251 (PMC6631943; doi:10.3390/pharmaceutics11060251)
Supplement: Supplementary file 1 [file pharmaceutics-11-00251-s001.pdf]

# Supplementary Materials: Physiologically Relevant In Vitro-In Vivo Correlation (IVIVC) Approach for Sildenafil with Site-Dependent Dissolution

Tae Hwan Kim, Soyoung Shin, Seok Won Jeong, Jong Bong Lee and Beom Soo Shin

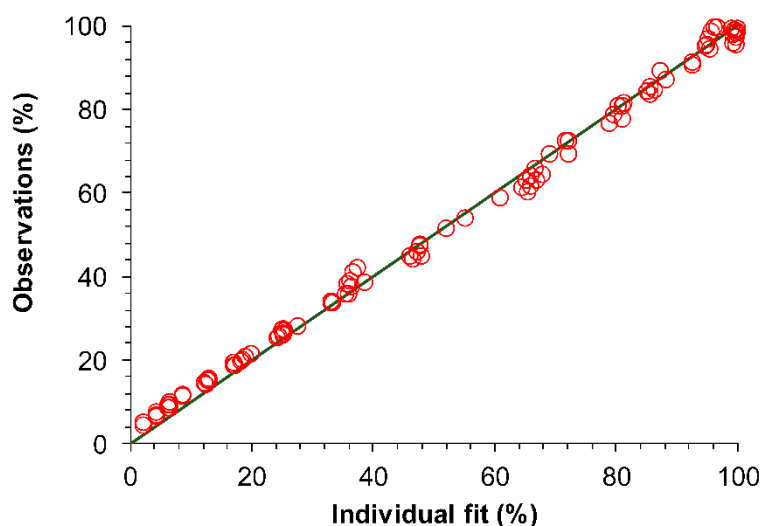

**Figure S1.** Comparison between the observed and the predicted percentage of drug release profiles of sildenafil IR and SR tablets.

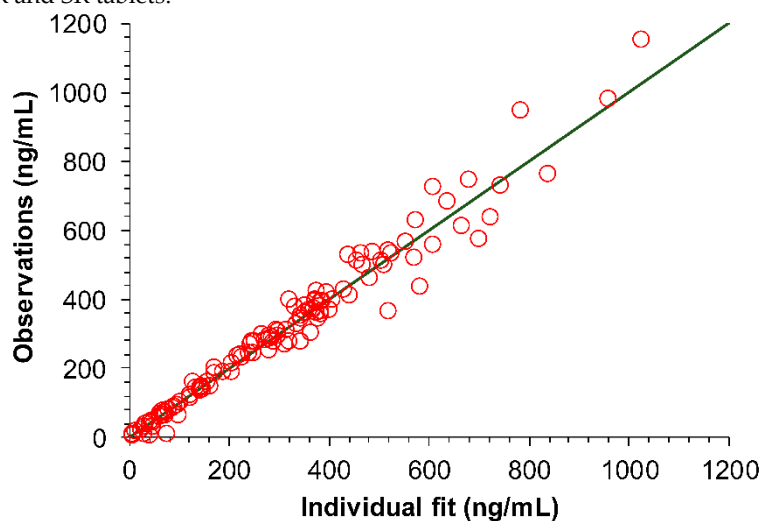

**Figure S2.** Comparison between the observed and fitted plasma concentrations of sildenafil obtained after oral administration of the IR and SR tablets in Beagle dogs.
